# Supplementary material for: Ozone Production and Its Sensitivity to NO x and VOCs: Results from the DISCOVER-AQ Field Experiment, Houston 2013
Source: Copernicus journal article supplement (doi:10.5194/acp-2016-215), 2016-05-13
Supplement: Supplementary file [file acp-2016-215-AC2-supplement.pdf]

Supporting Information for:

## Ozone Production and Its Sensitivity to NO<sub>x</sub> and VOCs: Results from the DISCOVER-AQ Field Experiment, Houston 2013

Gina M. Mazzuca<sup>1</sup>, Xinrong Ren<sup>1,2,\*</sup>, Christopher P. Loughner<sup>2,3</sup>, Mark Estes<sup>5</sup>, James H. Crawford<sup>6</sup>, Kenneth E. Pickering<sup>1,4</sup>, Andrew J. Weinheimer<sup>7</sup>, and Russell R. Dickerson<sup>1</sup>

<sup>1</sup>Department of Atmospheric and Oceanic Science, University of Maryland, College Park, MD 20742, USA

<sup>2</sup>Air Resources Laboratory, National Oceanic and Atmospheric Administration, College Park, MD 20740, USA

<sup>3</sup>Earth System Science Interdisciplinary Center, University of Maryland, College Park, MD 20740, USA

<sup>4</sup>NASA Goddard Space Flight Center, Greenbelt, MD 20771, USA

<sup>5</sup>Texas Commission on Environmental Quality, Austin, TX 78711, USA

<sup>6</sup>NASA Langley Research Center, Hampton, VA 23681, USA

<sup>7</sup>National Center for Atmospheric Research, Boulder, CO 80307, USA

\*Correspondence to: X. Ren ([ren@umd.edu](mailto:ren@umd.edu))

SI 1.

Both NO<sub>x</sub> and VOC levels in Houston have been continuously decreasing in the past 15-20 years as shown in Figure 1, the time series of NO<sub>x</sub>, ethane, and propene at two monitoring sites near the Houston Ship Channel.

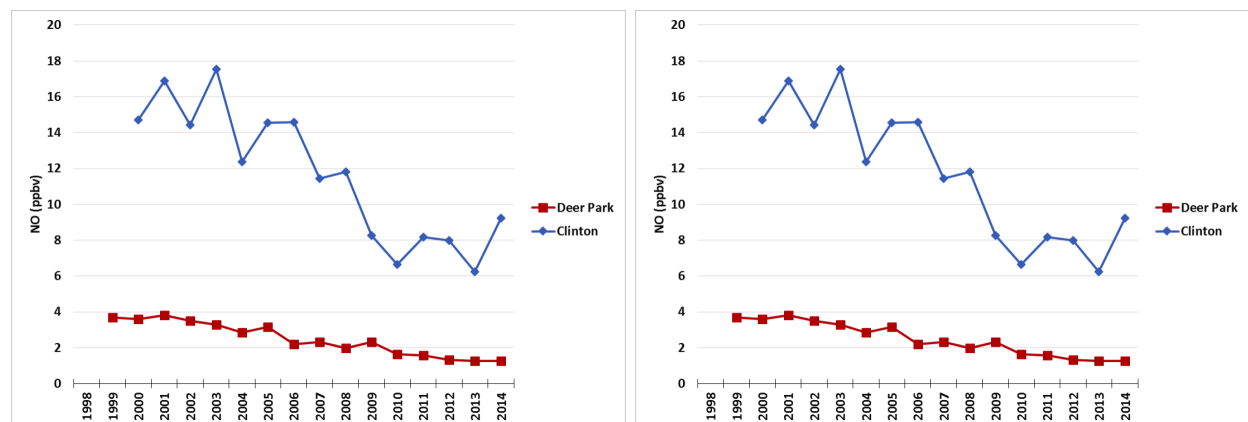

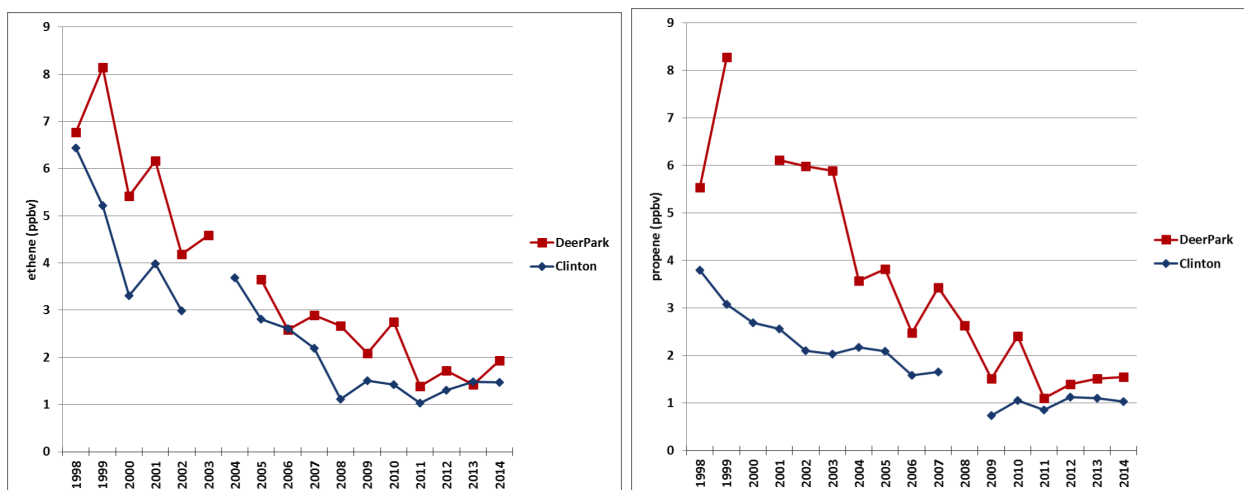

**Figure S1.** Time series of NO, NO<sub>x</sub>, ethane and propene concentrations at the Deer Park and Clinton sites from 1998 to 2014. The Deer Park site is located in southeast of the Ship Channel. The Clinton site is located on the northwestern end of the Ship Channel. Each data point represents an average of hourly samples collected between July 1 and November 30 for each year. Missing data points indicate that too few valid samples (< 70%) were collected during that year. NO and NO<sub>x</sub>\* data collected hourly using chemiluminescence sampler with molybdenum catalyst to convert NO<sub>x</sub>\* (not true NO<sub>x</sub> because Mo catalyst converts other N species besides NO<sub>2</sub> to NO) to NO. VOC data collected over a 40 minute period each hour using automated gas chromatography with cryogenic pre-concentration.

The NO<sub>x</sub> levels and OH reactivity in Houston during DAQ2013 and in Maryland during DAQ2011 are quite different, as shown in Figure 2. Houston has much higher NO<sub>x</sub> levels throughout the day. For OH reactivity, it is greater in Houston than in Maryland in the morning, but is comparable in both location in the afternoon. Note as shown in Figure 4, due to different emission sources, in Houston anthropogenic VOCs are the main contributor to the OH reactivity from VOCs, while in Maryland, biogenic VOCs (mainly isoprene) dominates the OH reactivity from VOCs. Different NO<sub>x</sub> levels and different VOC sources in Houston and Maryland are responsible for the different OPE values in the two areas.

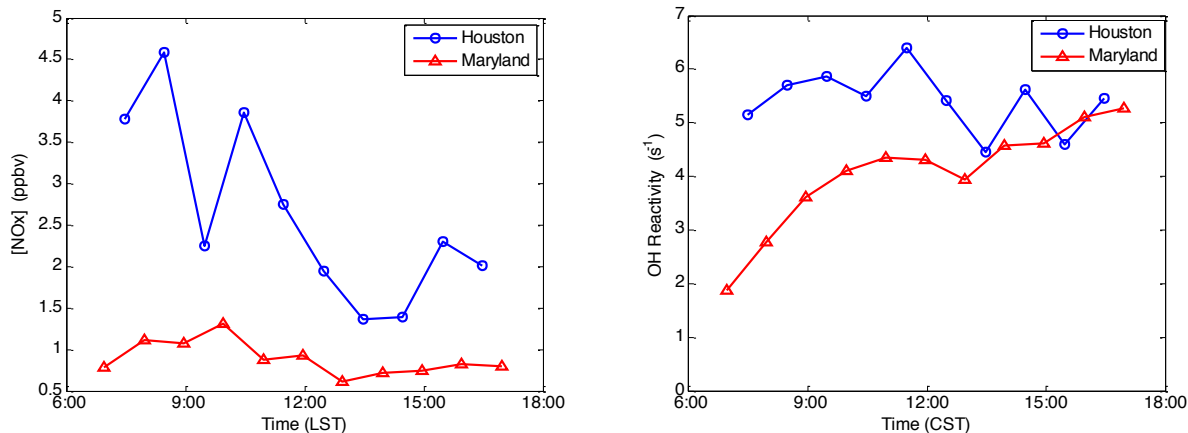

**Figure S2.** Diurnal variations of NO<sub>x</sub> (left) and OH reactivity (Right) in Houston (linked blue circles) during DAQ2013 and in Maryland (linked red triangles) during DAQ2011.

SI 2.

CMAQ simulated a high bias in surface and aloft ozone (Table 1). CMAQ also simulated a low bias in CO, CH<sub>2</sub>O, isoprene, NO<sub>2</sub>, and NO aloft and a high bias in NO<sub>y</sub> aloft (Table 2). Recent work has shown that oceanic emissions of iodine and bromine result in ozone destruction (Carpenter et al., 2013). The high ozone bias in our results is expected due to the lack of oceanic iodine and bromine emissions and the associated chemistry. Biases in surface ozone are larger near the coastline (i.e., Galveston) than sites inland (i.e., Conroe).

**Table S1.** Mean bias (MB), normalized mean bias (NMB), normalized mean error (NME), root mean square error (RMSE), and Gross Error (GE) of surface ozone for the 2<sup>nd</sup> iterative 1 km WRF simulations covering all of September 2013.

|         | Surface Ozone (ppbv) |
|---------|----------------------|
| MB      | 9.5                  |
| NMB (%) | 39                   |
| NME (%) | 51                   |
| RMSE    | 15                   |
| GE      | 12                   |

**Table S2.** Second iterative 1 km CMAQ simulated mean bias (MB), normalized mean bias (NMB), normalized mean error (NME), and root mean square error (RMSE) of O<sub>3</sub>, CO, CH<sub>2</sub>O, Isoprene (ISO), NO<sub>2</sub>, NO, and NO<sub>y</sub> covering measurements made onboard the NASA P-3B aircraft on all flight days during the DISCOVER-AQ field campaign

|       |      | O <sub>3</sub> | CO   | CH <sub>2</sub> O | ISO   | NO <sub>2</sub> | NO   | NO <sub>y</sub> |
|-------|------|----------------|------|-------------------|-------|-----------------|------|-----------------|
| Model | MB   | 0.8            | -5.8 | -0.3              | -0.02 | -0.5            | -0.3 | 0.04            |
|       | NMB  | 1.4            | -4.8 | -16               | -7.7  | -39             | -66  | 1.3             |
|       | NME  | 15             | 17   | 37                | 70    | 70              | 84   | 61              |
|       | RMSE | 12             | 35   | 1.4               | 0.7   | 3.1             | 2.2  | 4.7             |

### SI 3.

An evaluation of the improved WRF and CMAQ model simulations for the entire month of September 2013 was conducted. Statistics used to evaluate WRF and CMAQ are described Table S3. CMAQ simulated a high bias in surface and aloft ozone (Table S1). CMAQ also simulated a low bias in CO, CH<sub>2</sub>O, isoprene, NO<sub>2</sub>, and NO aloft and a high bias in NO<sub>y</sub> aloft (Table S2). Recent work has shown that oceanic emissions of iodine and bromine result in ozone destruction. The high ozone bias in our results is expected due to the lack of oceanic iodine and bromine emissions and the associated chemistry. Biases in surface ozone are larger near the coastline (i.e., Galveston) than sites inland (i.e., Conroe) as shown in Figure S3.

**Table S3.** Definition of the statistics used in WRF and CMAQ model evaluations. In these equations M represents the model results, O represents the observations, and N is the number of data points.

|                               |                                                                        |
|-------------------------------|------------------------------------------------------------------------|
| Mean Bias (MB)                | $MB = \frac{1}{N} \sum_{i=1}^N (M_i - O_i)$                            |
| Normalized Mean Bias (NMB)    | $NMB = \frac{\sum_{i=1}^N (M_i - O_i)}{\sum_{i=1}^N O_i} \times 100\%$ |
| Normalized Mean Error (NME)   | $NME = \frac{\sum_{i=1}^N  M_i - O_i }{\sum_{i=1}^N O_i} \times 100\%$ |
| Root Mean-Square Error (RMSE) | $RMSE = \sqrt{\frac{1}{N} \sum_{i=1}^N (M_i - O_i)^2}$                 |
| Gross Error (G)               | $GE = \frac{1}{N} \sum_{i=1}^N  M_i - O_i $                            |

**Table S4.** Mean bias (MB), normalized mean bias (NMB), normalized mean error (NME), root mean square error (RMSE), and Gross Error (GE) of 2 m temperature, 10 m wind speed, and 10 m wind direction for the 2<sup>nd</sup> iterative 1 km WRF simulations covering all of September 2013.

|         | 2 m Temperature (K) |       | 10 m Wind Speed (m/s) |       | 10 m Wind Direction (deg) |       |
|---------|---------------------|-------|-----------------------|-------|---------------------------|-------|
|         |                     | Model |                       | Model |                           | Model |
| MB      |                     | 0.2   |                       | -0.8  |                           | 32    |
| NMB (%) |                     | 0.1   |                       | -17   |                           | 26    |
| NME (%) |                     | 0.4   |                       | 36    |                           | 26    |
| RMSE    |                     | 1.6   |                       | 2.3   |                           | 51    |
| GE      |                     | 1.2   |                       | 1.7   |                           | 32    |

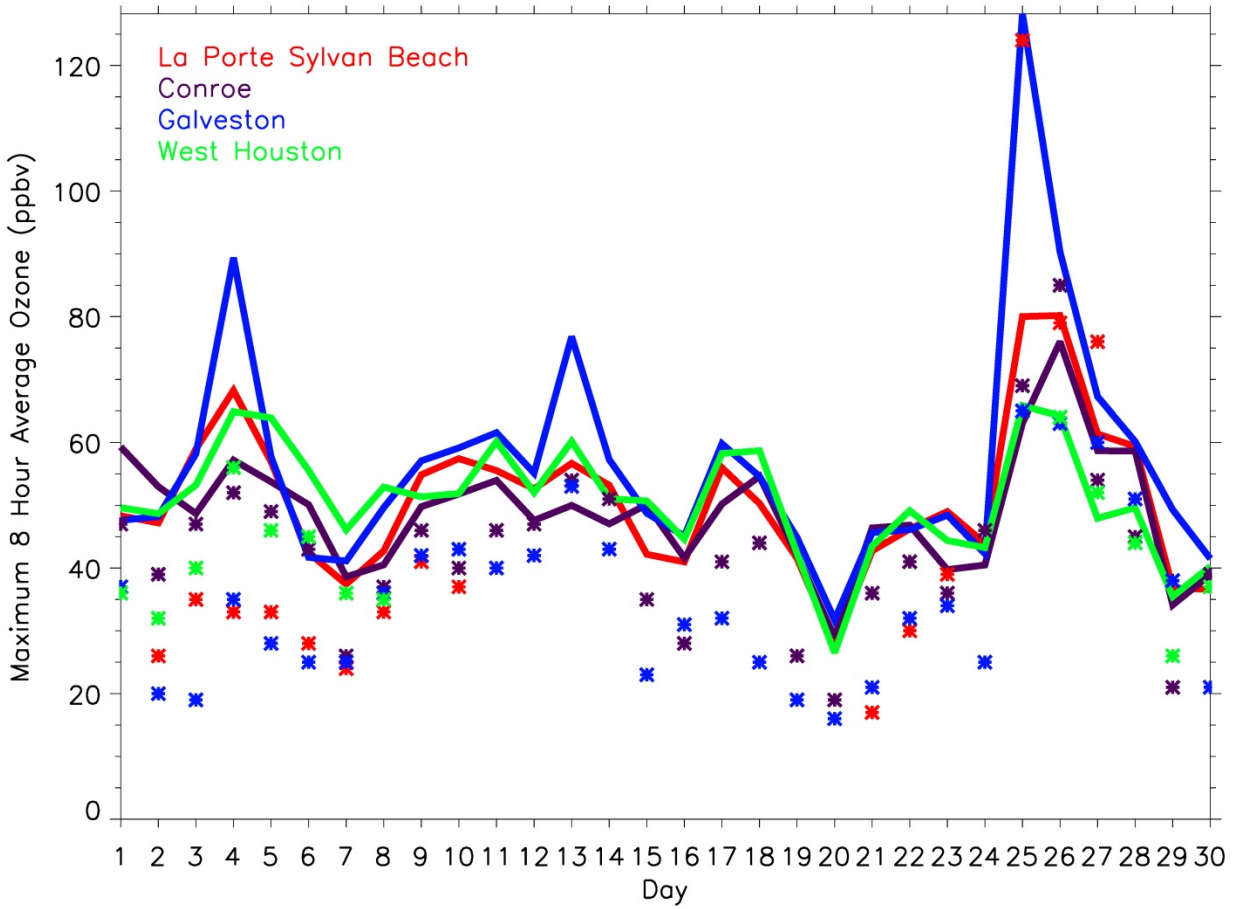

**Figure S3.** Observed (\*) and CMAQ simulated (solid lines) maximum 8 hour average ozone at La Porte Sylvan Beach (red), Conroe (purple), Galveston (blue), and West Houston (green) during September 2013.

SI 4.

The median OH reactivity due to non-methane hydrocarbons (NMHCs) was  $3.3 \text{ s}^{-1}$  observed during DISCOVER-AQ 2013 in Houston and  $1.2 \text{ s}^{-1}$  observed during DISCOVER-AQ 2011 in Maryland. As shown in Figure 2, alkanes and alkenes were dominant contributors to the OH reactivity due to NMHCs in Houston in 2013, while isoprene and alkanes were dominant contributors to the OH reactivity due to NMHCs in Maryland in 2011. The differences in overall OH reactivity and its distributions in the two locations are responsible to the different OPEs in the two different environments.

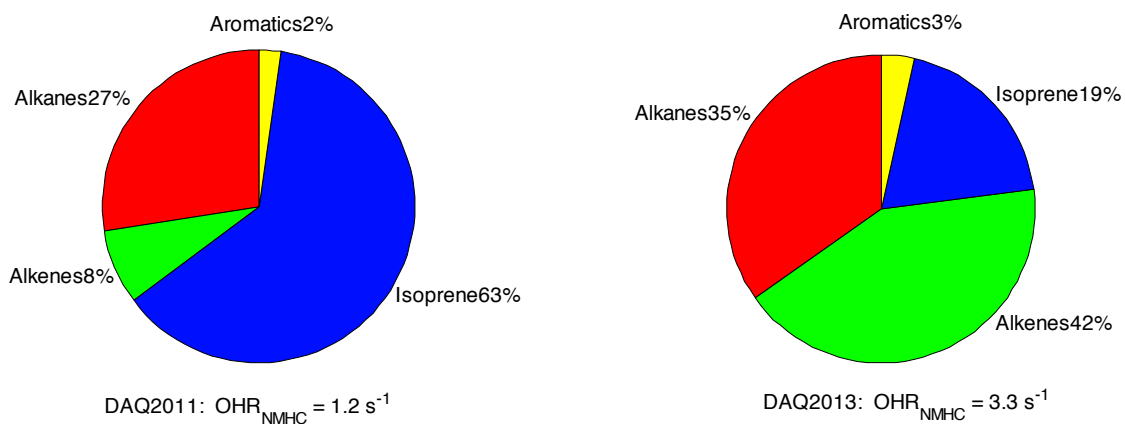

**Figure S4.** Distributions of OH reactivity due to non-methane hydrocarbons in DISCOVER-AQ 2011 in Maryland (left) and 2013 in Houston (right).
